# Supplementary material for: Elevated Kallistatin promotes the occurrence and progression of non-alcoholic fatty liver disease
Source: PubMed Central journal article supplement (PMC10933339; doi:10.1038/s41392-024-01781-9), 2024-03-12

**Fig. 2o**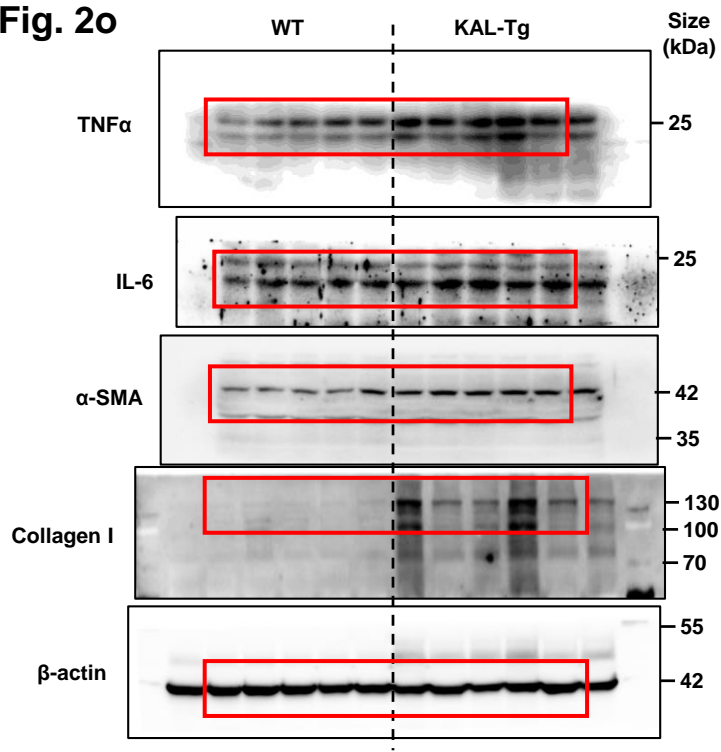**Fig. 2r**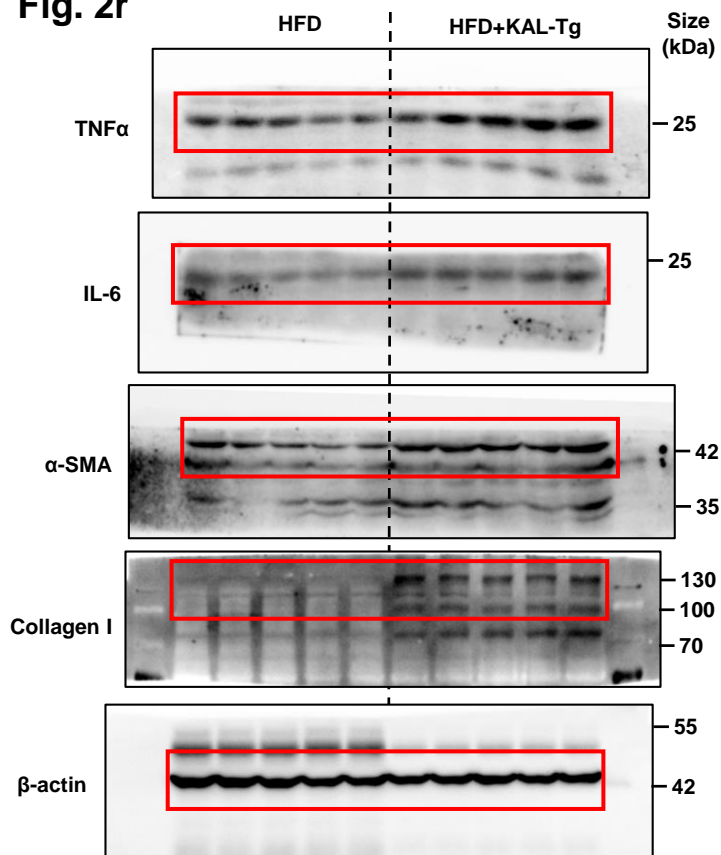

**Fig. 3h**

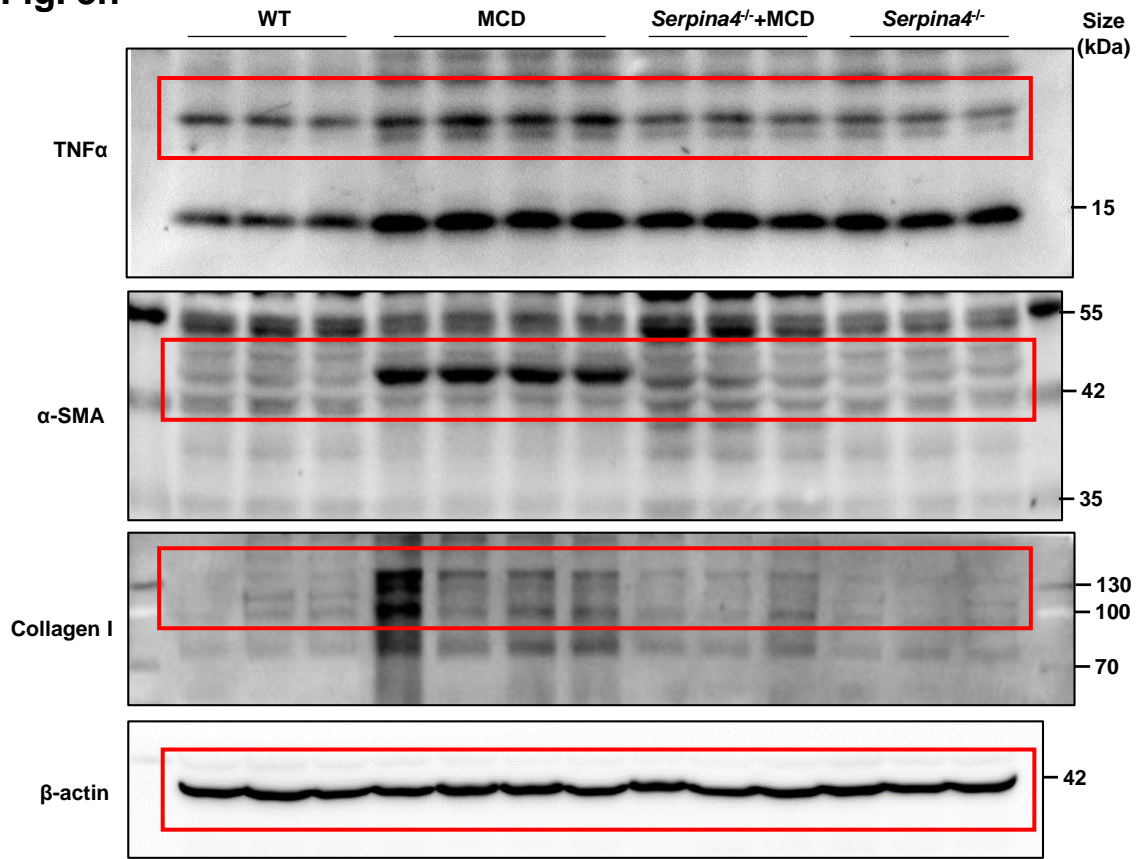

**Fig. 4a**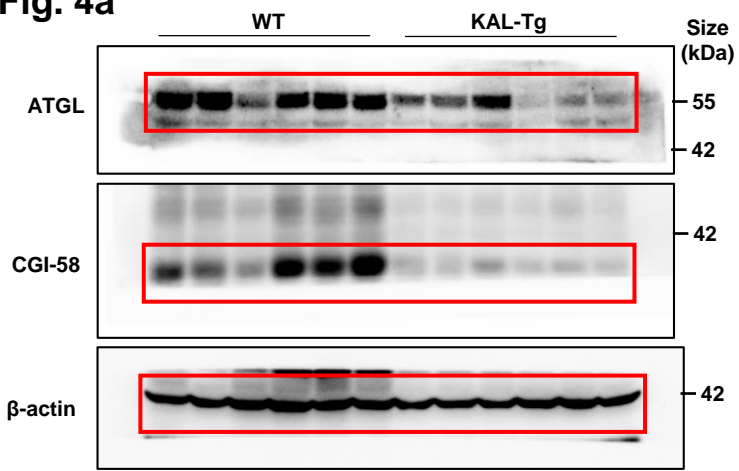**Fig. 4b**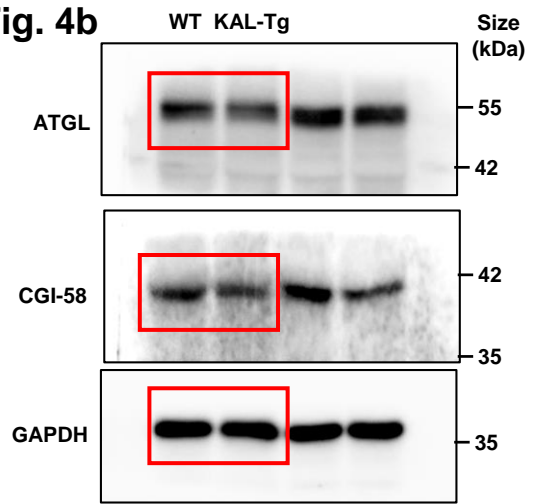**Fig. 4e**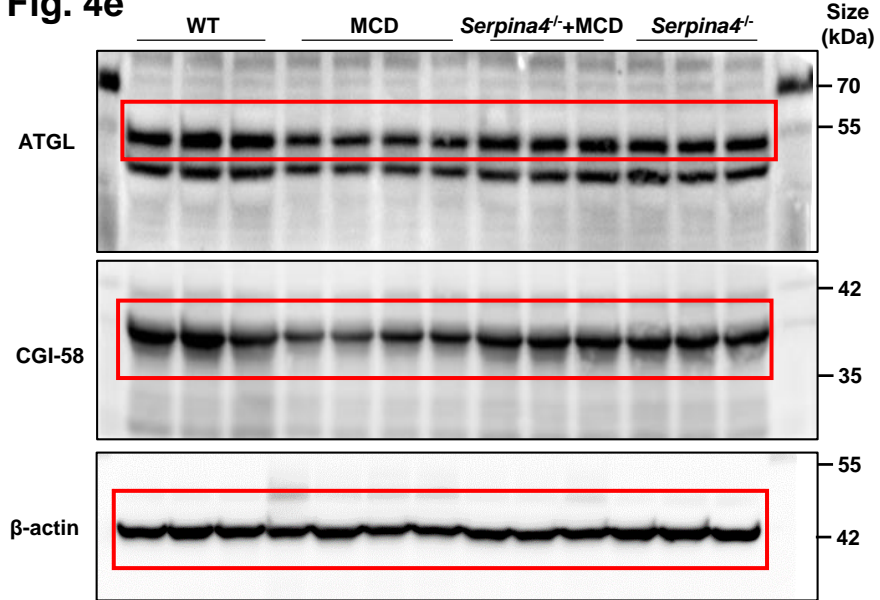**Fig. 4g**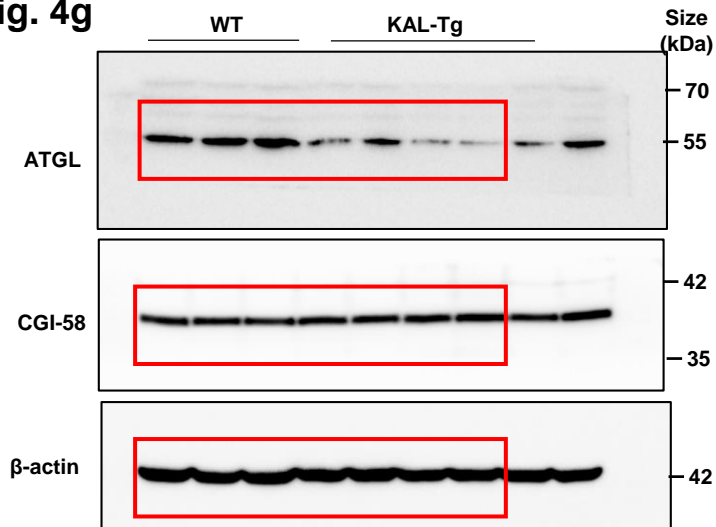**Fig. 4k**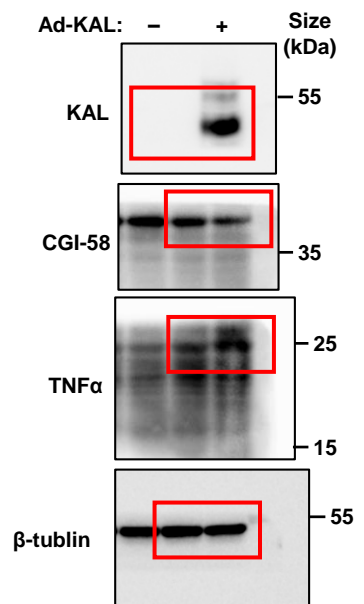

**Fig. 4m**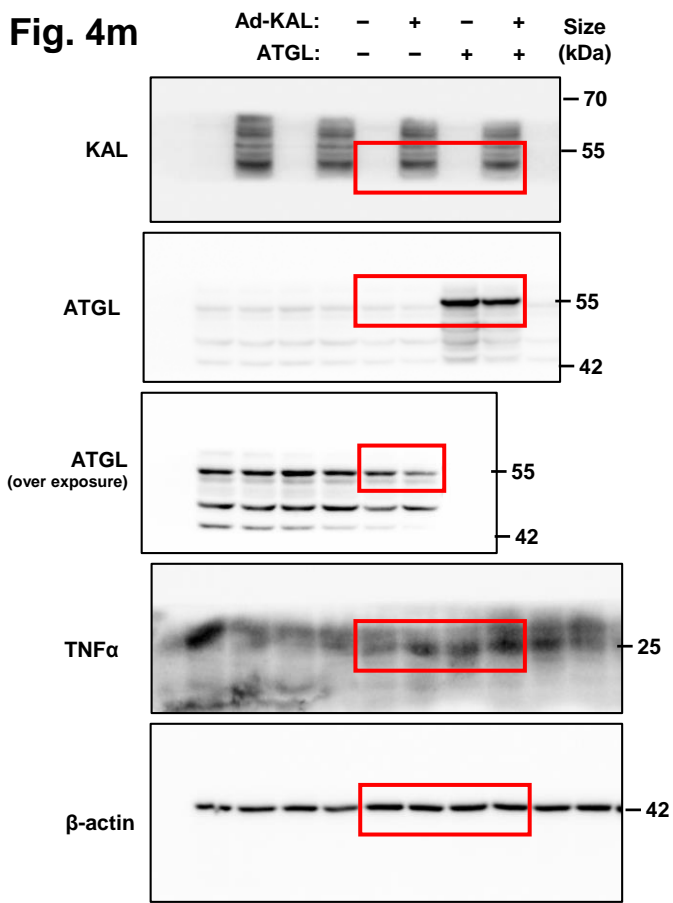**Fig. 4o**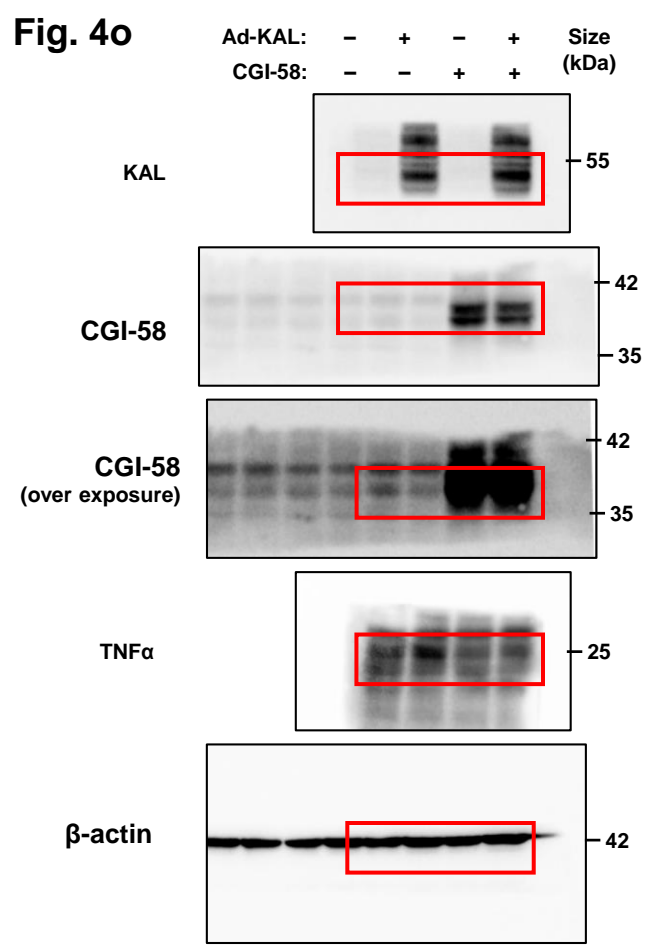**Fig. 4p**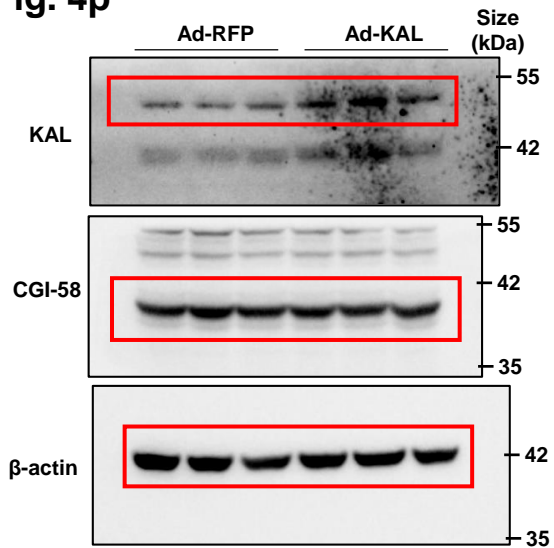

**Fig. 5a**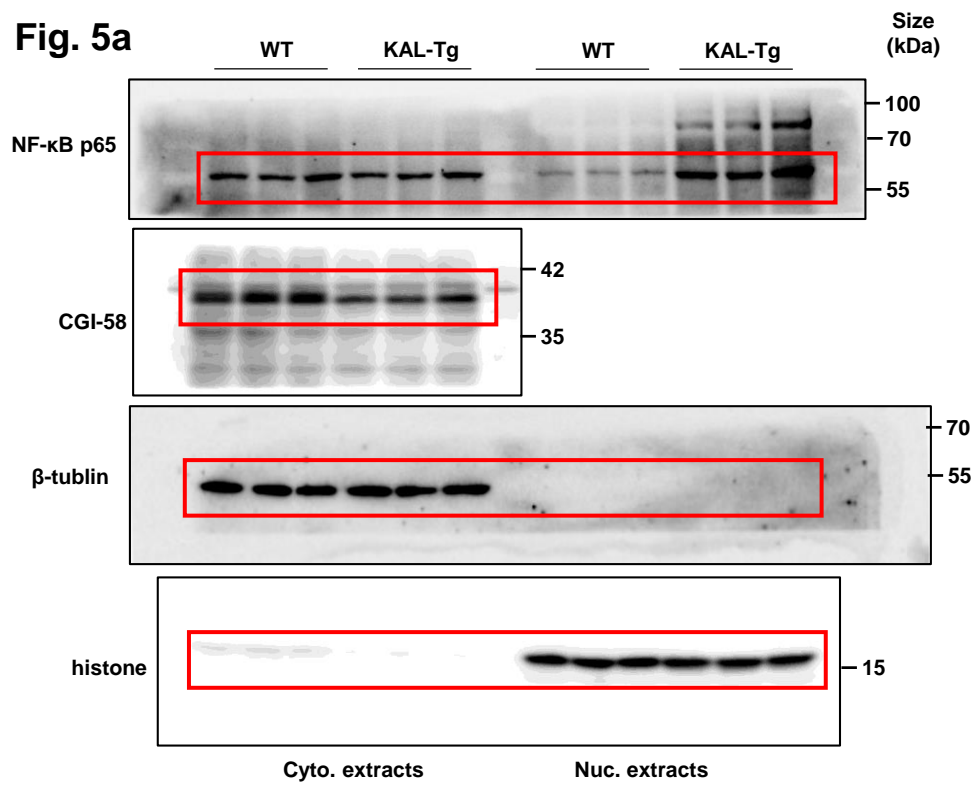**Fig. 5c**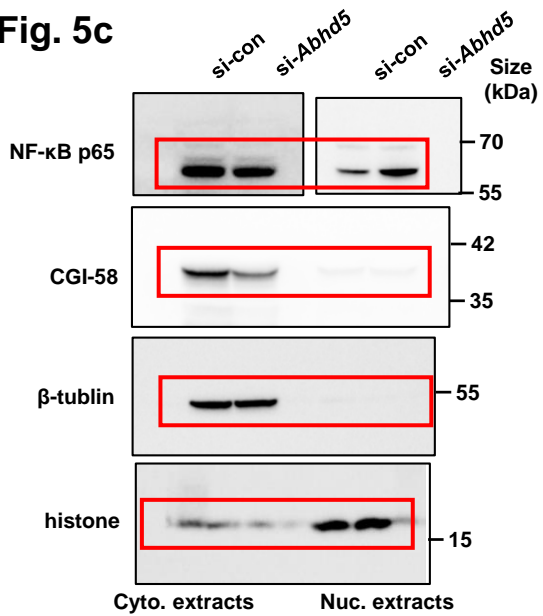**Fig. 5e**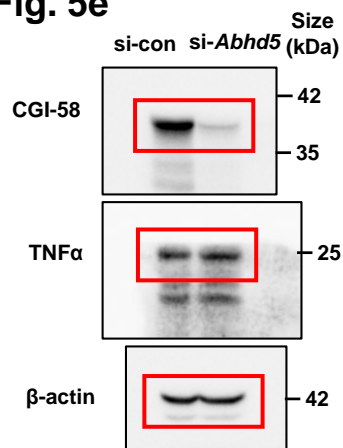

**Fig. 5g**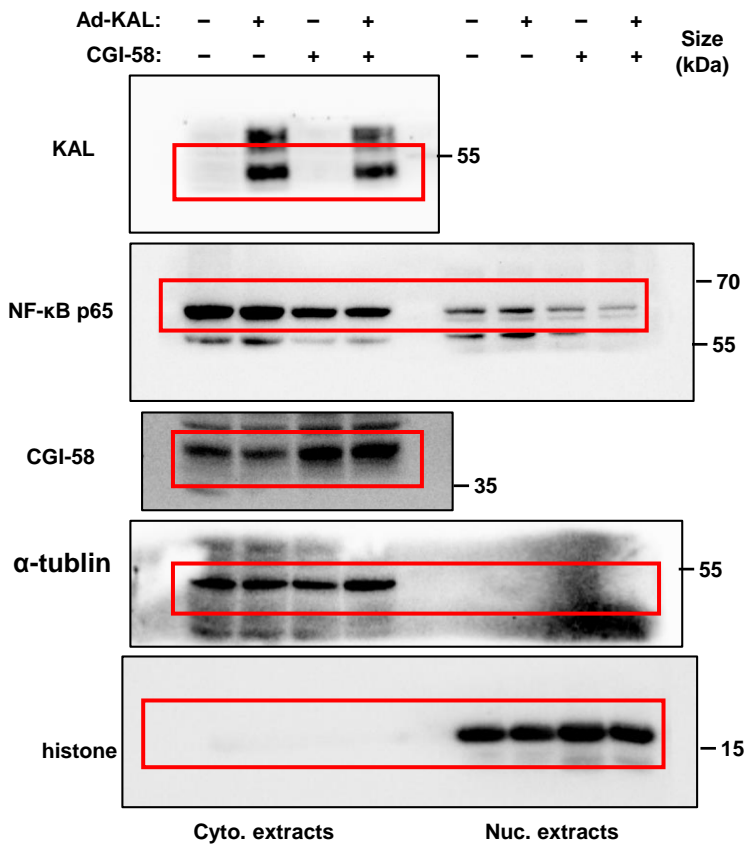**Fig. 5i**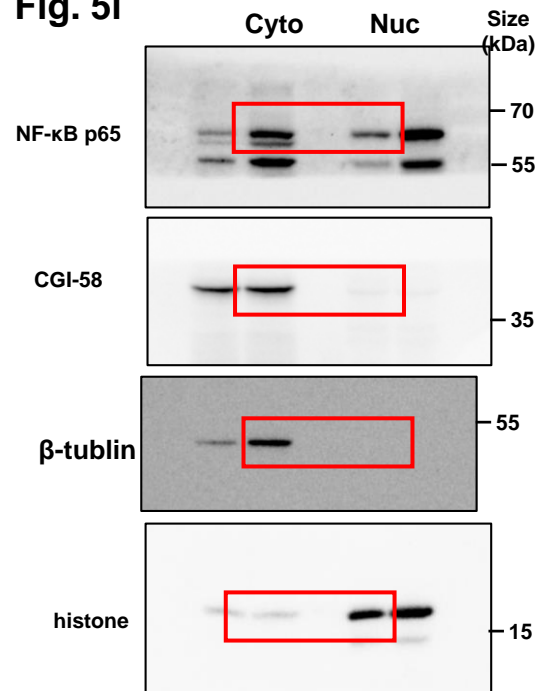**Fig. 5j**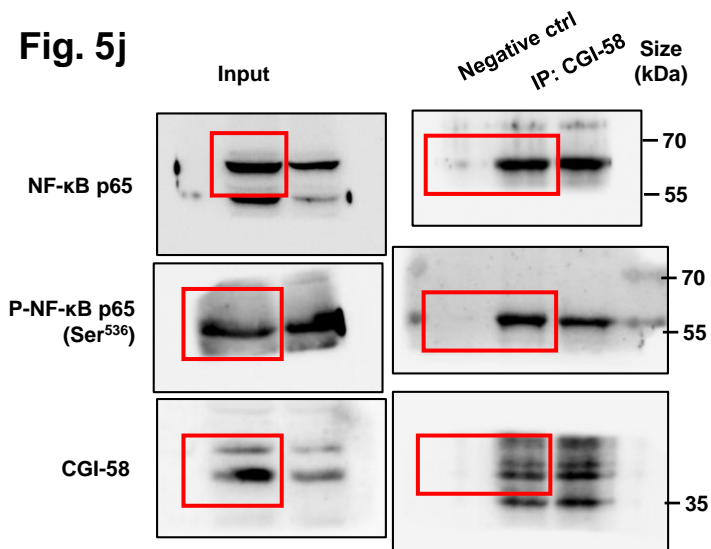

**Fig. 5k**

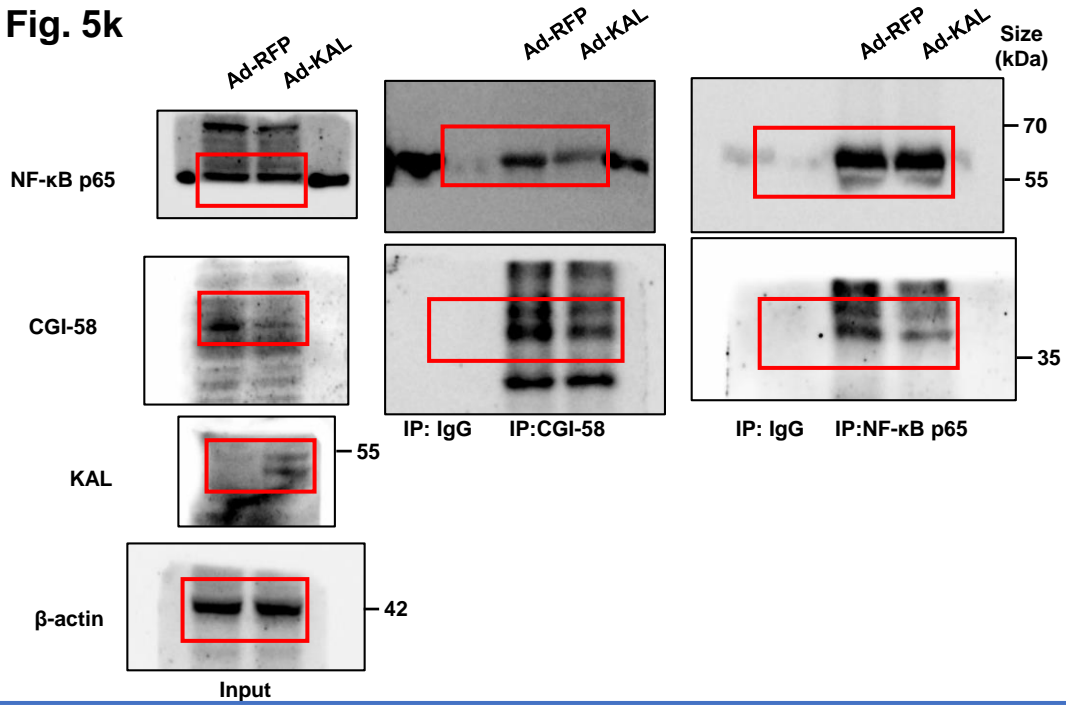

**Fig. 5m**

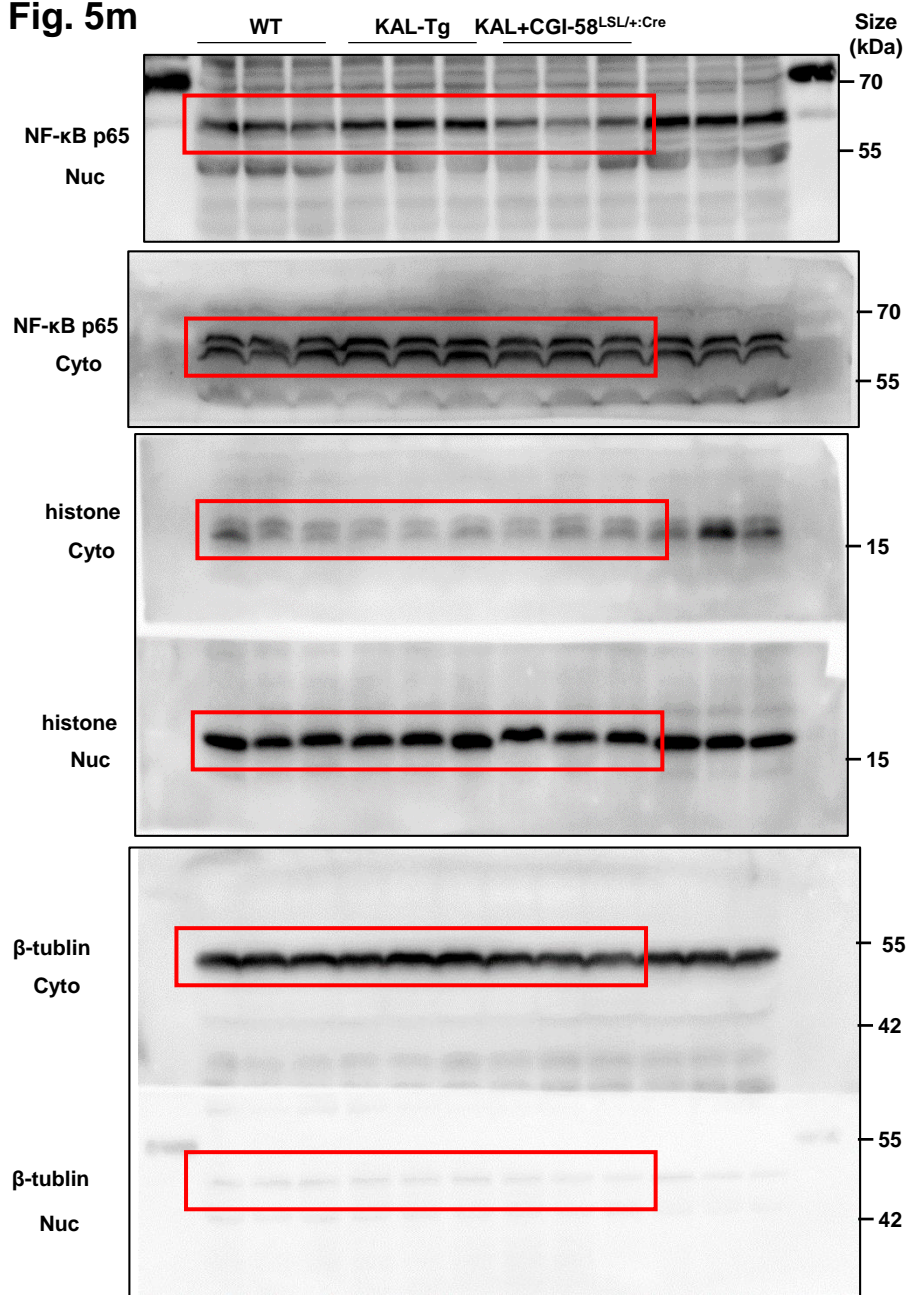

**Fig. 6a**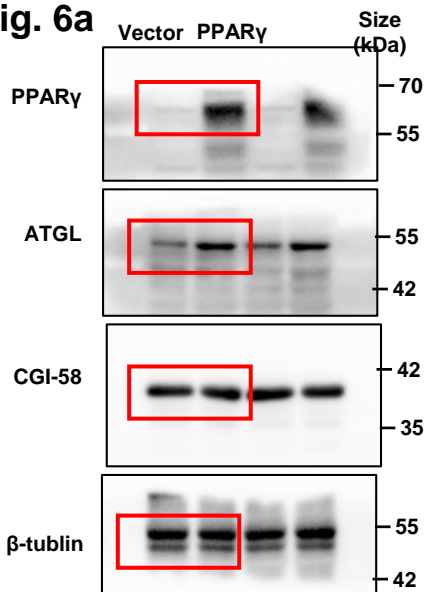**Fig. 6b**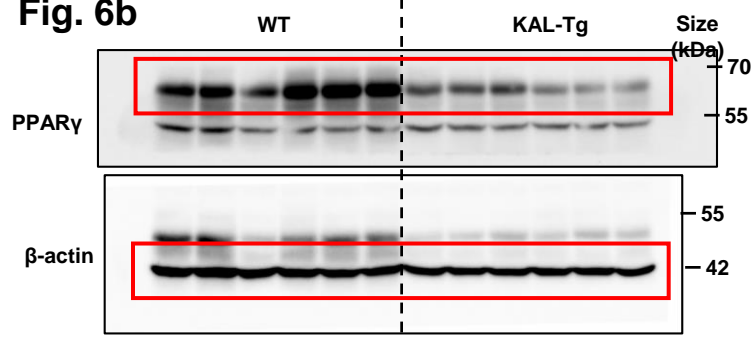**Fig. 6c**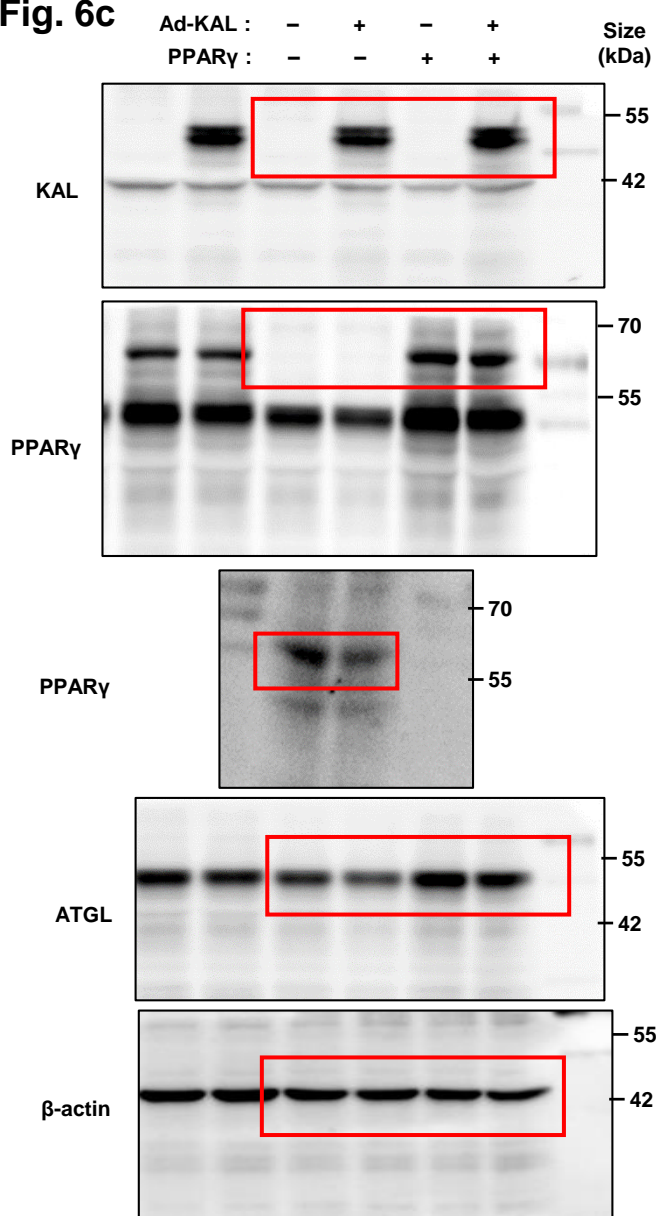**Fig. 6d**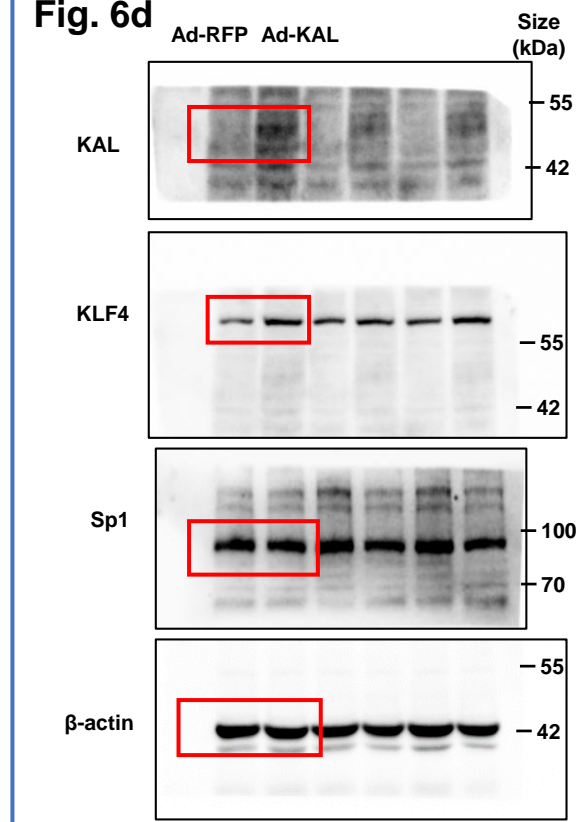



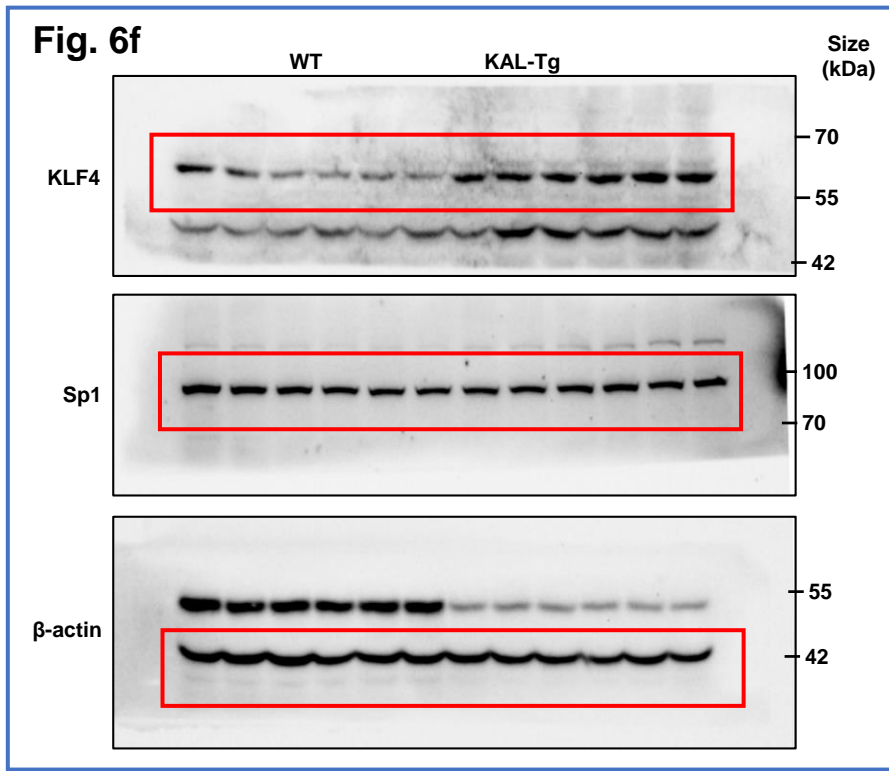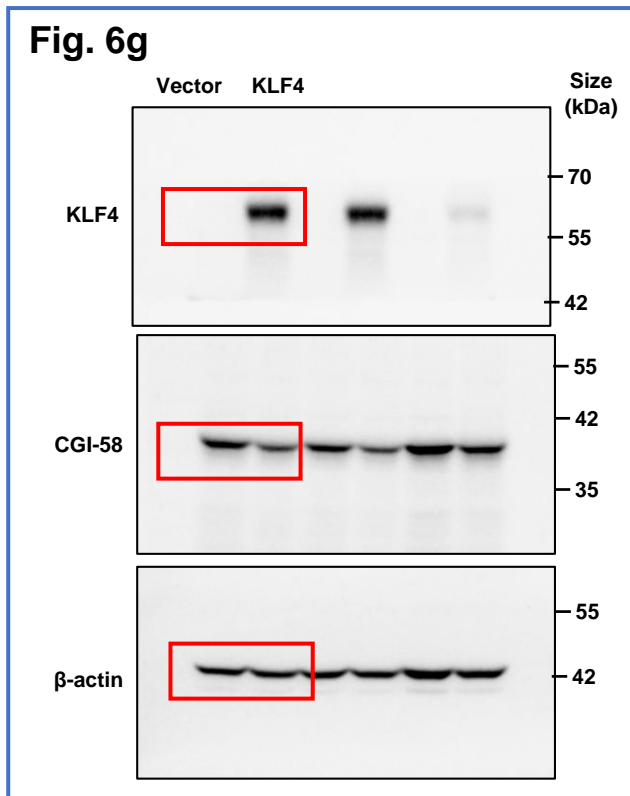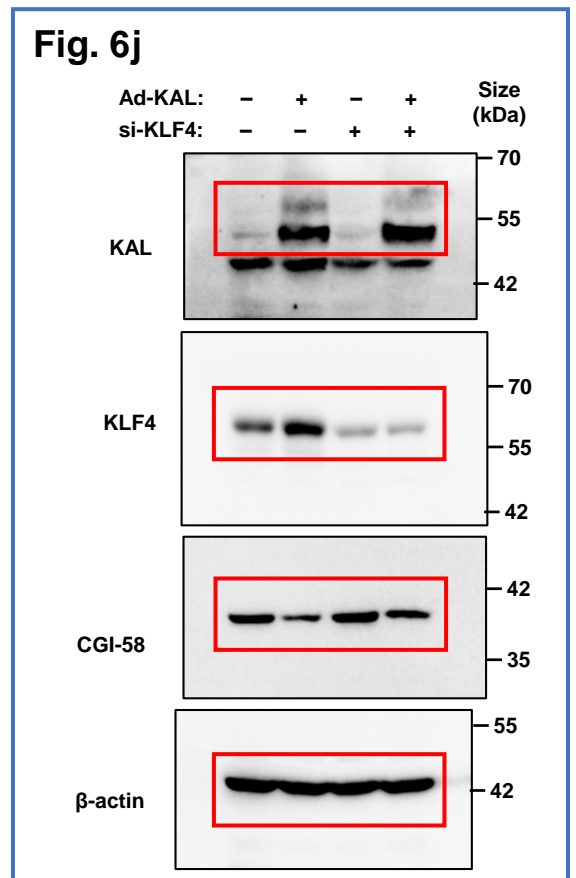

**Fig. 7a**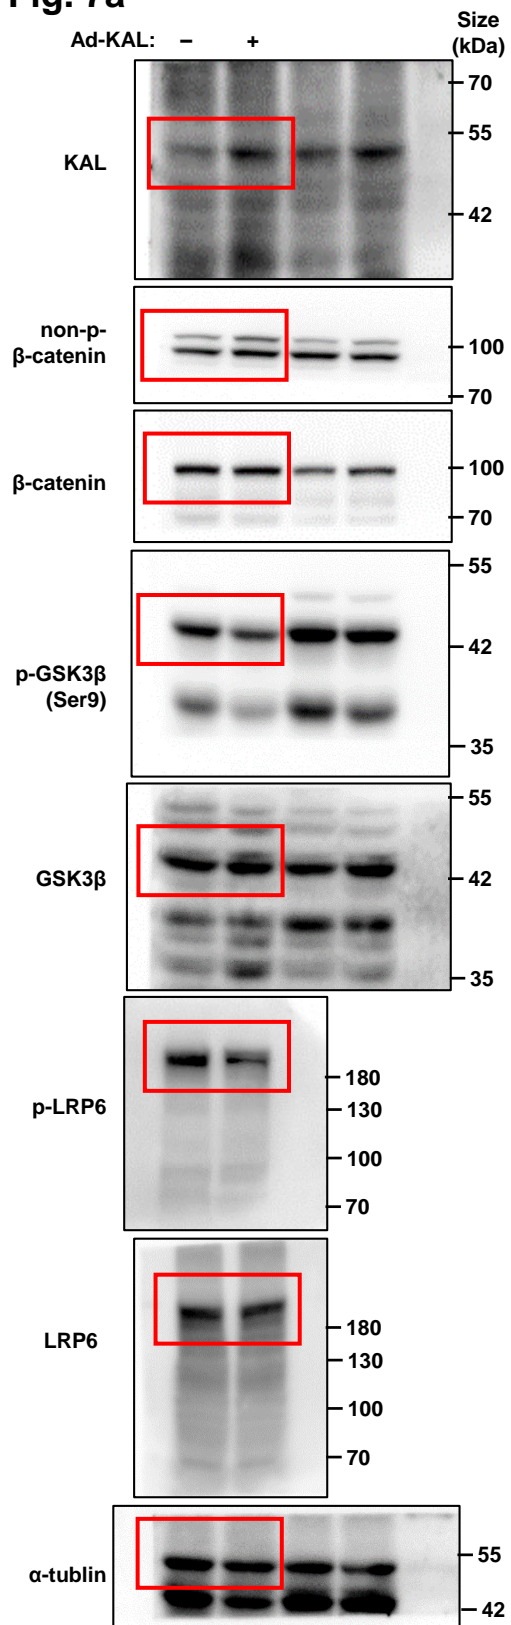**Fig. 7b**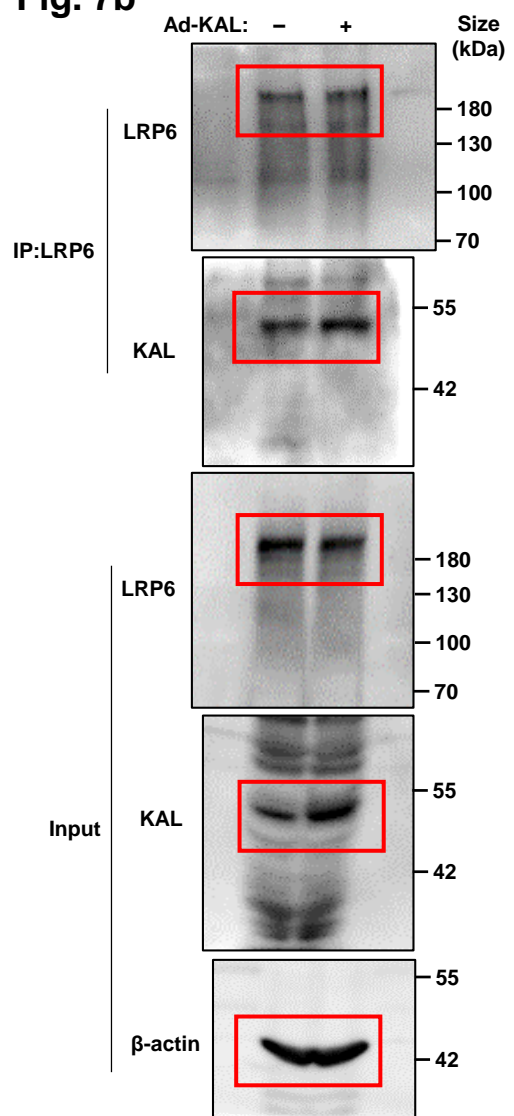**Fig. 7c**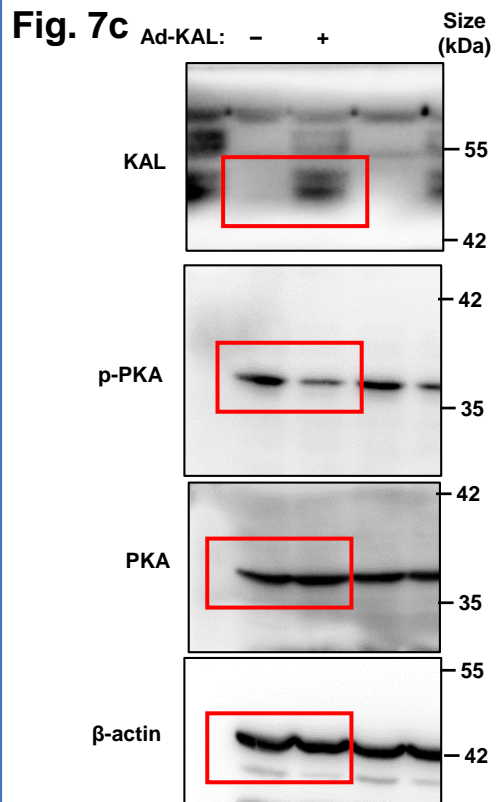

**Fig. 7d**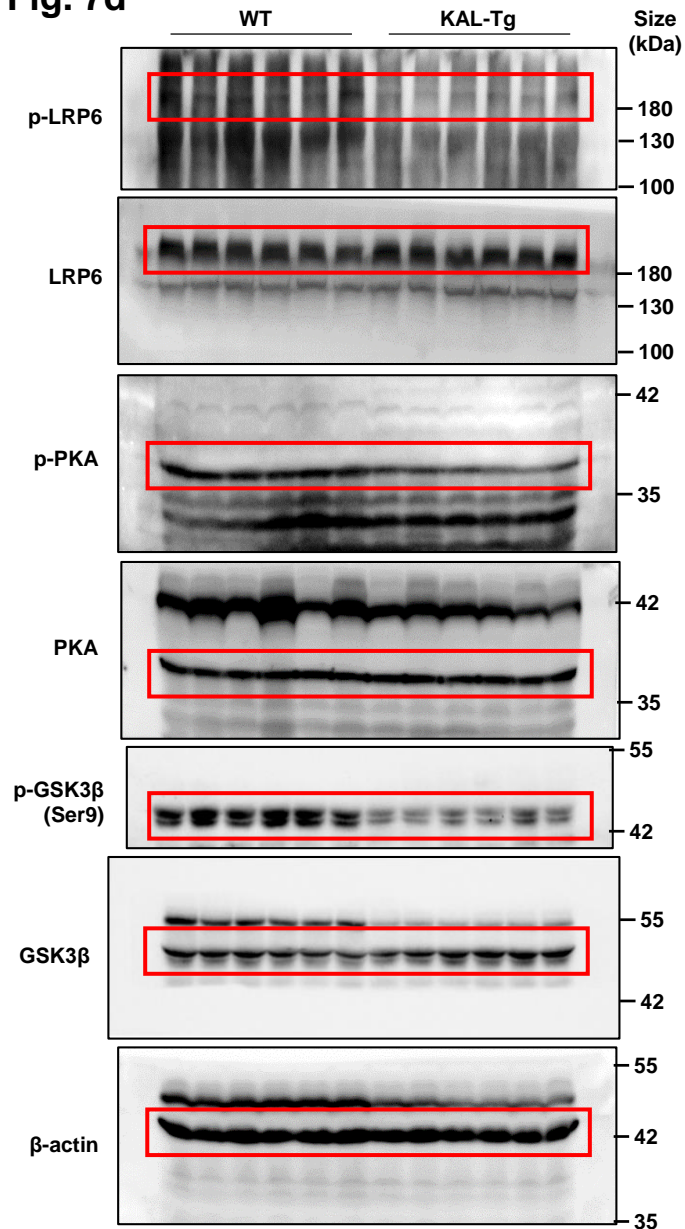**Fig. 7e**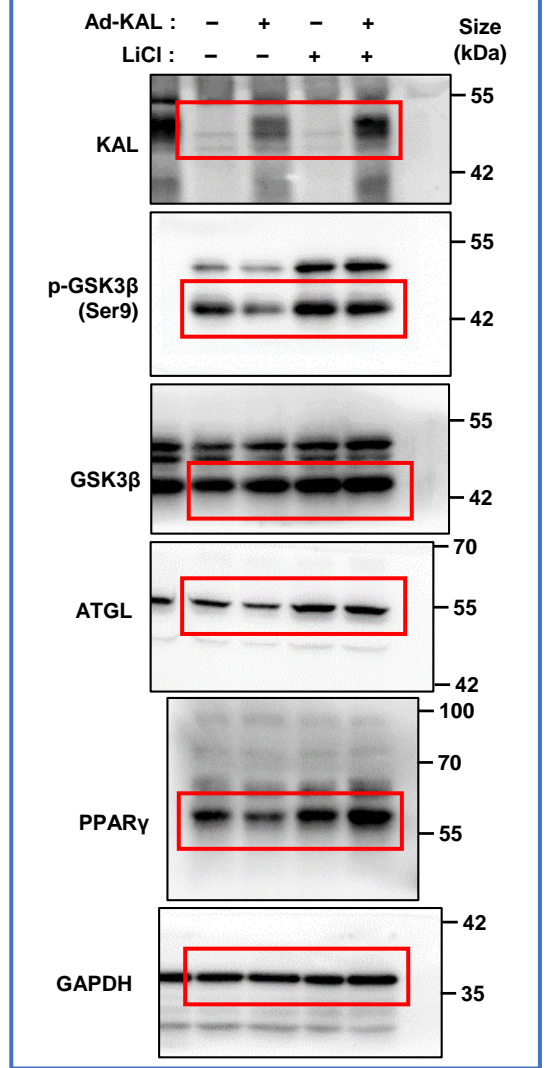**Fig. 7g**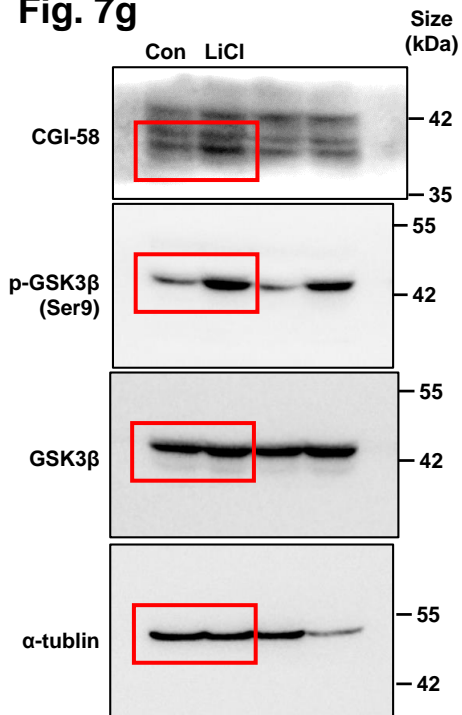**Fig. 7i**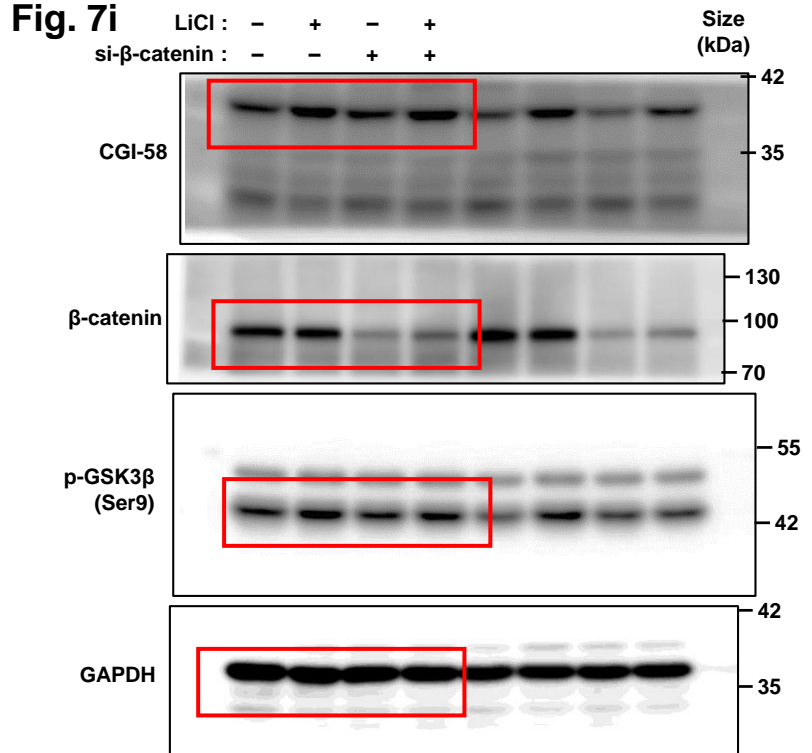

**Fig. 7k**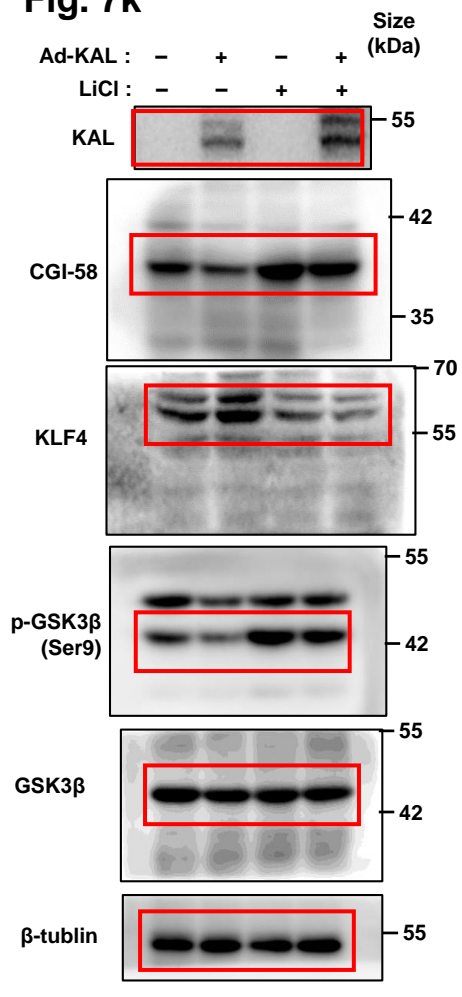**Fig. 7l**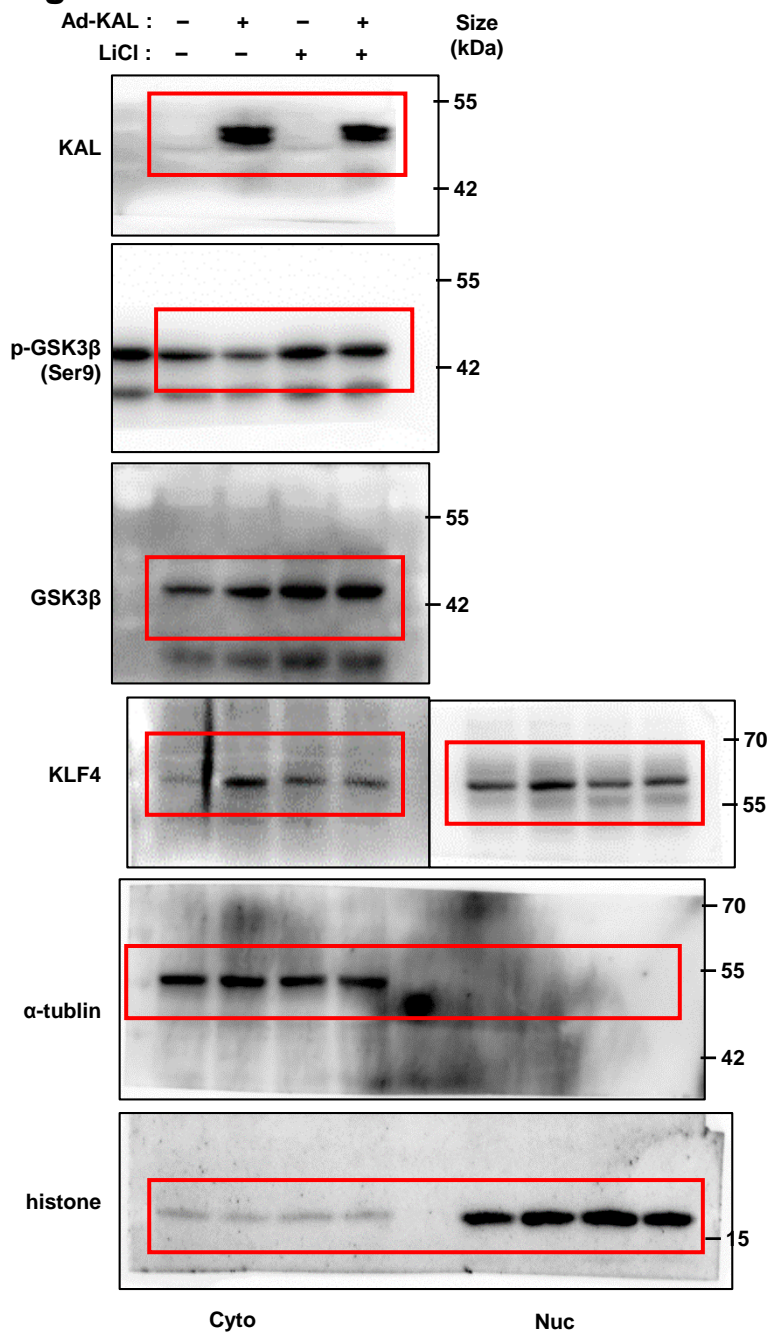

**Fig. 8a**

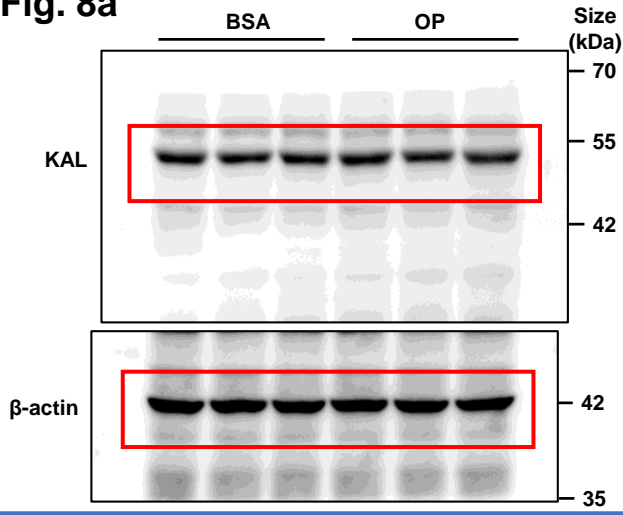

**Fig. 8b**

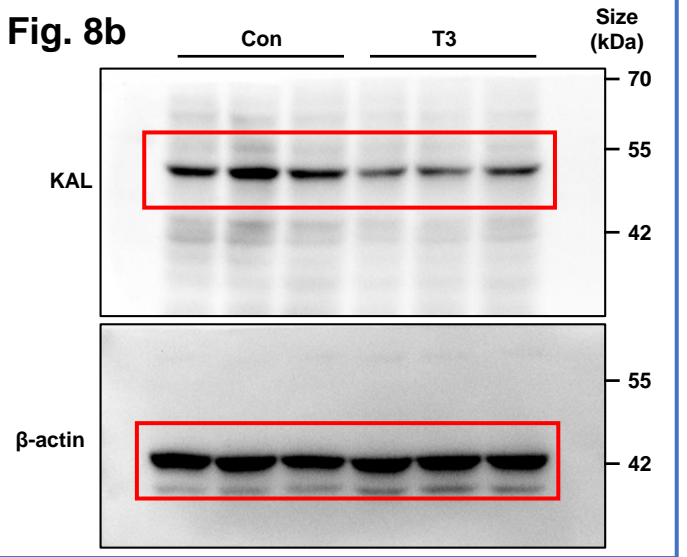

**Fig. 8c**

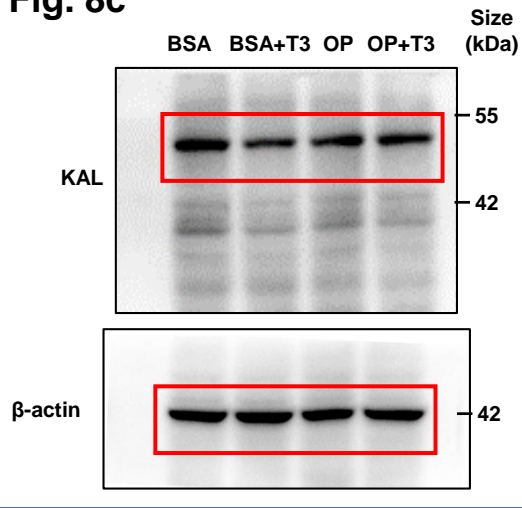

**Fig. 8i**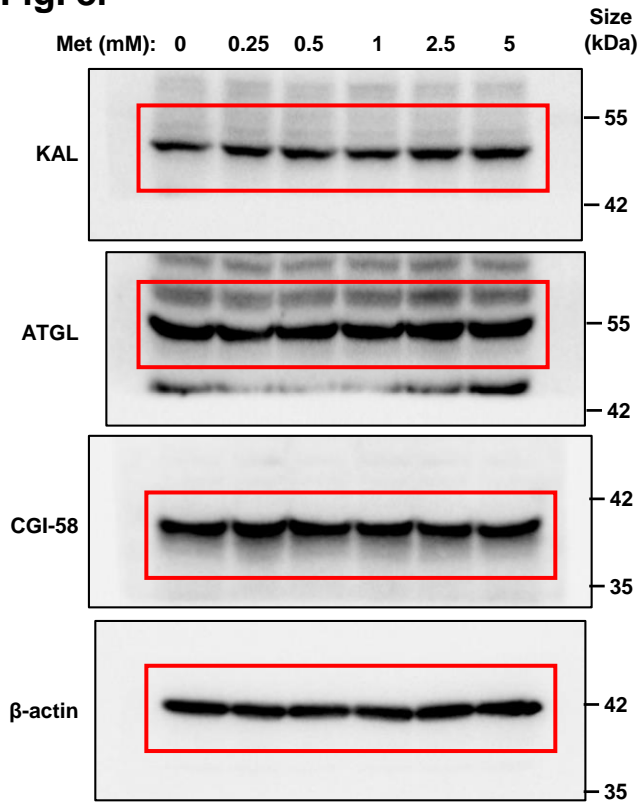**Fig. 8j**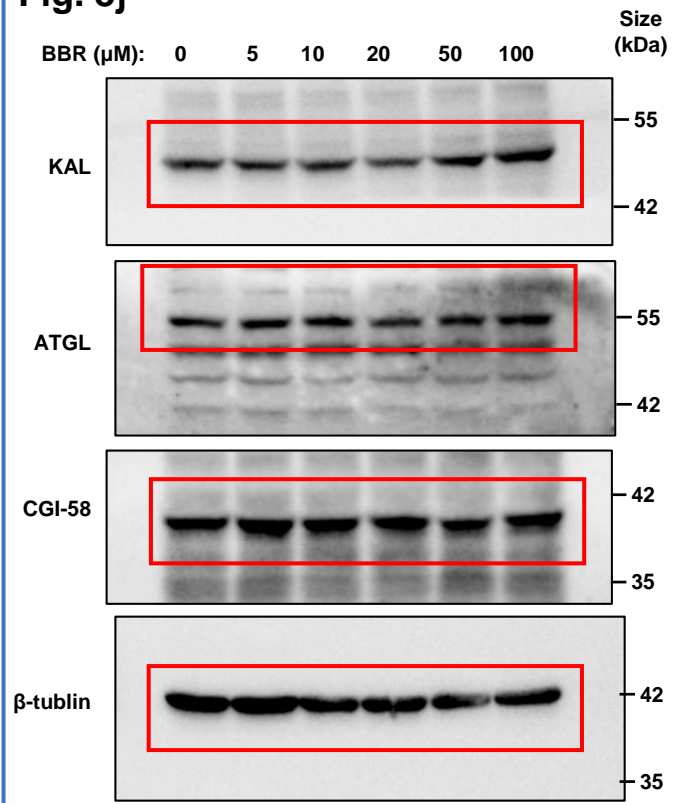**Fig. 8k**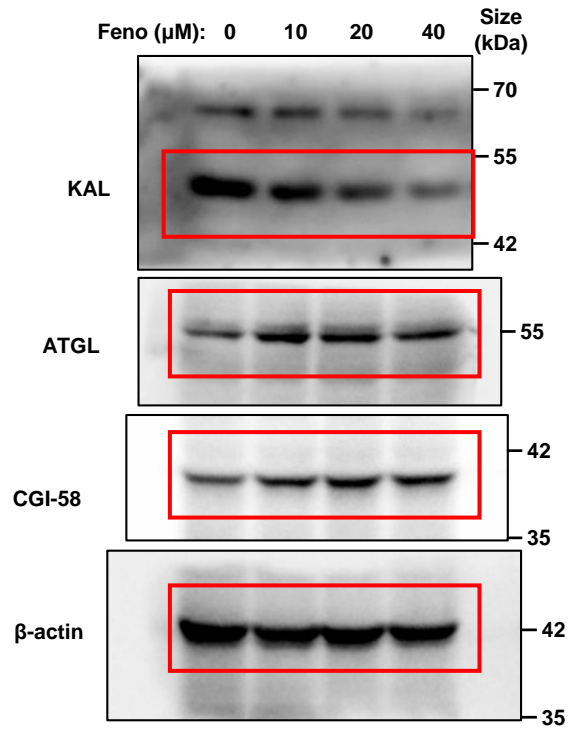

Supplement: 41392_2024_1781_MOESM2_ESM.pdf [file 41392_2024_1781_MOESM2_ESM.pdf]
